# Supplementary material for: Anti-Inflammatory Properties and Gut Microbiota Modulation of Porphyra tenera Extracts in Dextran Sodium Sulfate-Induced Colitis in Mice
Source: Antioxidants (Basel). 2020 Oct 14;9(10):988. doi: 10.3390/antiox9100988 (PMC7602078; doi:10.3390/antiox9100988)
Supplement: Supplementary file 1 [file antioxidants-09-00988-s001.pdf]

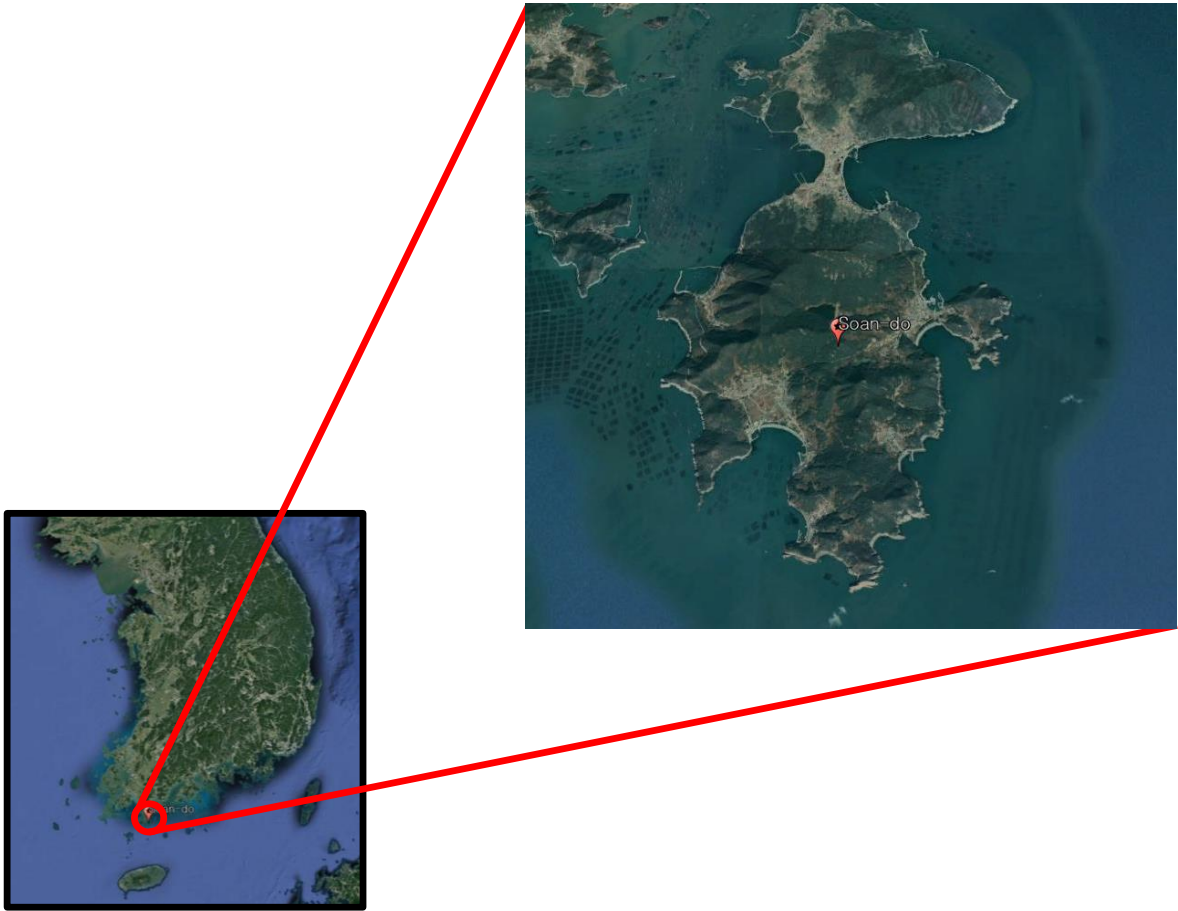

**Figure 1.** The sampling location of *Porphyra tenera* (Soan-do; 38°8'29.36"N, 126°39'22.59"E). These maps were modified using Google Earth software.

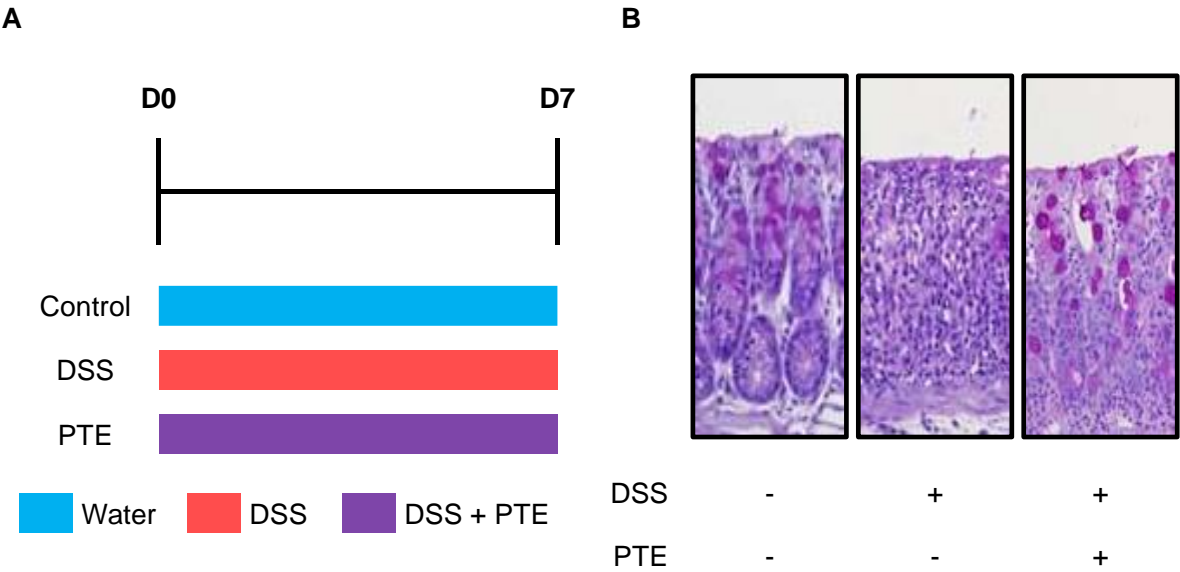

**Figure 2.** Experimental design of animal experiments (A) and representative images of histological changes (B). In histological analysis, alcian blue PAS staining was performed to evaluate the effect of PT extracts on the histological changes of goblet cells.

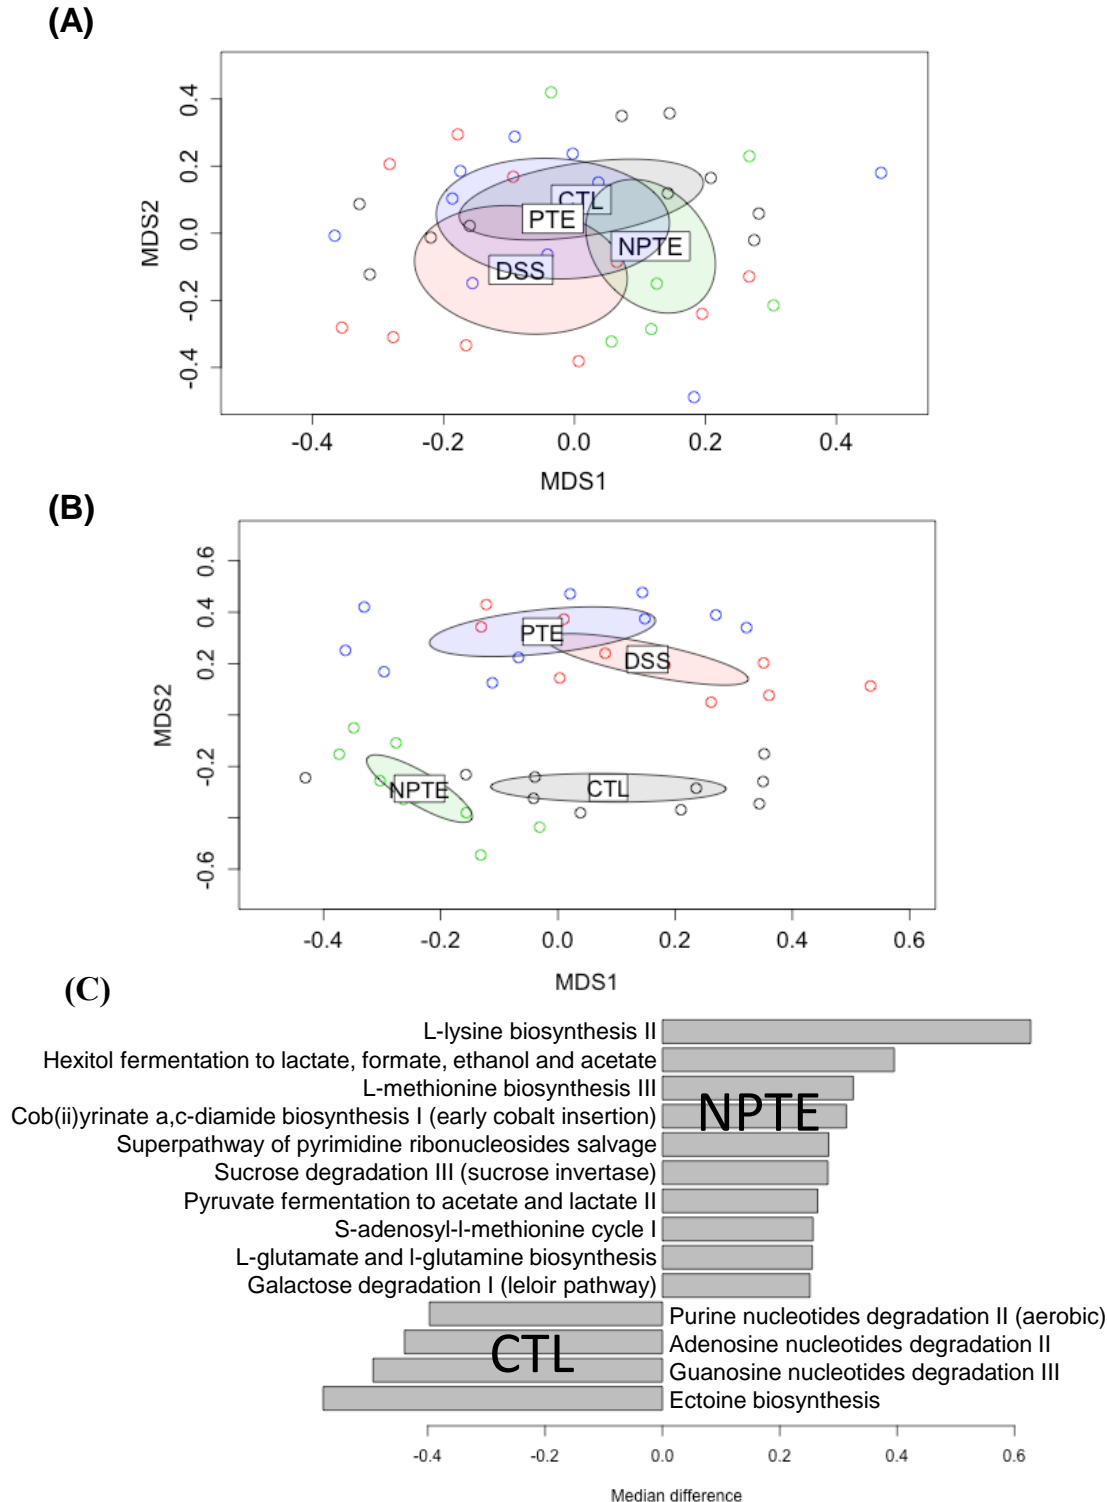

**Figure 3.** Non-multidimensional scaling analysis showing gut microbiota difference at Day 0 (A) and Day 7(B). Ellipses in NMDS were drawn with a 0.95 confidence level using R vegan package. Differentially abundant predicted metabolic pathways in CTL and NPTE groups (C). NPTE, PTE, DSS, and CTL indicate mice treated with PT extracts, mice treated with PT extracts and DSS, mice treated with DSS, and control mice not treated with PT extracts nor DSS, respectively.

## Enriched

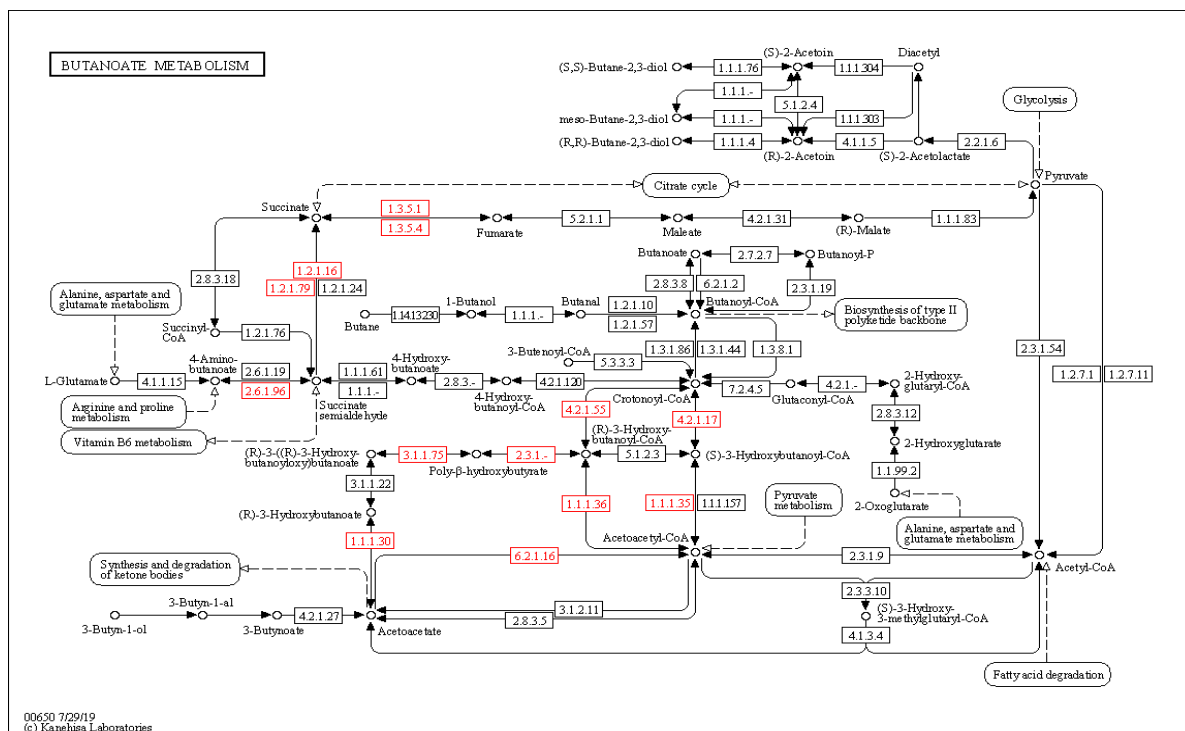

## Depleted

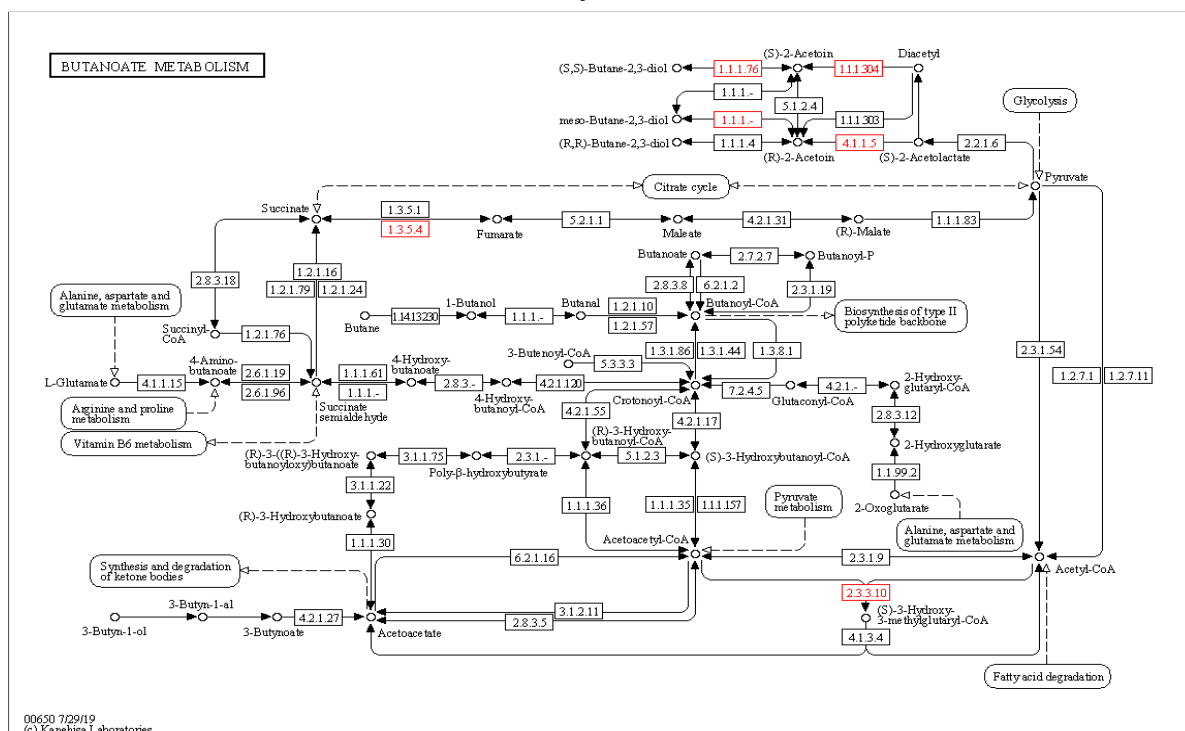

**Figure 4.** Significantly enriched and depleted KEGG orthologues (KO) in the butanoate metabolism.

**Table 1.** The detail description of significantly enriched and depleted butanoate metabolic pathways.

| KOs <sup>1</sup> | Name      | Definitions                                                                                                    | Effect size Difference |
|------------------|-----------|----------------------------------------------------------------------------------------------------------------|------------------------|
| K16871           | POP2      | 4-aminobutyrate-pyruvate transaminase [EC:2.6.1.96]                                                            | 2.309182               |
| K01907           | AACS      | acetoacetyl-CoA synthetase [EC:6.2.1.16]                                                                       | 2.288249               |
| K05973           | phaZ      | poly(3-hydroxybutyrate) depolymerase [EC:3.1.1.75]                                                             | 2.037261               |
| K03821           | phbC      | polyhydroxyalkanoate synthase subunit PhaC [EC:2.3.1.-]                                                        | 1.652975               |
| K00019           | E1.1.1.30 | 3-hydroxybutyrate dehydrogenase [EC:1.1.1.30]                                                                  | 1.404745               |
| K00242           | sdhD      | succinate dehydrogenase/fumarate reductase, membrane anchor subunit                                            | 0.994379               |
| K17865           | croR      | 3-hydroxybutyryl-CoA dehydratase [EC:4.2.1.55]                                                                 | 0.8773                 |
| K00135           | gabD      | succinate-semialdehyde dehydrogenase/glutarate-semialdehyde dehydrogenase [EC:1.2.1.16 1.2.1.79 1.2.1.20]      | 0.87691                |
| K07516           | fadN      | 3-hydroxyacyl-CoA dehydrogenase [EC:1.1.1.35]                                                                  | 0.774637               |
| K00023           | phbB      | acetoacetyl-CoA reductase [EC:1.1.1.36]                                                                        | 0.653483               |
| K01692           | paaF      | enoyl-CoA hydratase [EC:4.2.1.17]                                                                              | 0.592833               |
| K00246           | frdC      | fumarate reductase subunit C                                                                                   | -0.56459               |
| K00245           | frdB      | fumarate reductase iron-sulfur subunit [EC:1.3.5.4]                                                            | -0.62834               |
| K03366           | butA      | meso-butanediol dehydrogenase/(S,S)-butanediol dehydrogenase/diacetyl reductase [EC:1.1.1.-1.1.1.76 1.1.1.304] | -0.6825                |
| K01641           | E2.3.3.10 | hydroxymethylglutaryl-CoA synthase [EC:2.3.3.10]                                                               | -0.74624               |
| K01575           | alsD      | acetolactate decarboxylase [EC:4.1.1.5]                                                                        | -0.78032               |

<sup>1</sup>KEGG orthologues.
